# Supplementary material
Source: PubMed Central journal article supplement (PMC2736870)
Supplement: NIHMS123862-supplement-Supplement.pdf [file NIHMS123862-supplement-Supplement.pdf]

## SUPPLEMENTARY MATERIALS

**Table S-1:** Oligonucleotide sequences used as primers.

|           |                                             |
|-----------|---------------------------------------------|
| G-1:      | 5'-GCGCATATGGCCAGCTCTGAGGGGACCCGC-3'        |
| G-2:      | 5'-GCGACTAGTTCACAAAGTACTCAAAAACCTTTG-3'     |
| G-3:      | 5'-GGTCTTTTACCTTCCAAACGTATGCCTGTCTCAGTCG-3' |
| G-4:      | 5'-CGACTGAGACAGGCATACGTTTGAAGGTAAAAGACC-3'  |
| P-1:      | 5'-CGCGCAATTAACCCTCACTAAAG-3'               |
| P-2:      | 5'-GAATAAGGGCGACACGGAAATG-3'                |
| P-3:      | 5'-GCGAAATTAATACGACTCACTATAGGG-3'           |
| P-4:      | 5'-GCTAGTTATTGCTCAGCGG-3'                   |
| R104NNS_f | 5'-ATAAGAGCTCAGCTTGCCTCTCTGAATGG-3'         |
| R104NNS_r | 5'-AAGCTGCGCTCTTATSNNACTGAGACAGGCATACG-3'   |
| D133NNS_f | 5'-GGTATATTTTTGCATCTAATTTGTATGAATCTG-3'     |
| D133NNS_r | 5'-TAGATGCAAAAATATACCTSNNACTATACACAGATCG-3' |
| D133A_f:  | 5'-GTGTATAGTGCCAGGTATATTTTTGCATCTAA-3'      |
| D133A_r:  | 5'-ATATACCTGGCACTATACACAGATCGTTCAA-3'       |
| R104M_f:  | 5'-CTGTCTCAGTATGATAAGAGCTCAGCTTGCCTC-3'     |
| R104M_r:  | 5'-GAGGCAAGCTGAGCTCTTATCATACTGAGACAGGC-3'   |
| A100V_f:  | 5'-CAAACGTATGTCTGTCTCAGTATGATAAG-3'         |
| A100V_r:  | 5'-ACTGAGACAGACATACGTTTGAAGGTAA-3'          |
| H202L_f:  | 5'-GCAAGGCATTCTCTTGAATATTTAGAGAAGCT-3'      |
| H202L_r:  | 5'-CTAAATATTCAAGAGGAATGCCTTGCTCTTC-3'       |
| N133G_f:  | 5'-TGTGTATAGTGGCAGGTATATTTTTGC-3'           |
| N133G_r:  | 5'-AATATACCTGCCACTATACACAGATCG-3'           |

**Table S-2:** Site-saturation mutagenesis; codon distributions in position 104 & 133.

|                     |          | <b>dA</b> | <b>dG</b> | <b>dC</b> | <b>T</b> |
|---------------------|----------|-----------|-----------|-----------|----------|
| <i>N (ideal)</i>    |          | 0.25      | 0.25      | 0.25      | 0.25     |
| <i>S (ideal)</i>    |          | 0         | 0.5       | 0.5       | 0        |
| <b>position 104</b> | <b>N</b> | 0.27      | 0.21      | 0.33      | 0.19     |
|                     | <b>N</b> | 0.21      | 0.26      | 0.32      | 0.21     |
|                     | <b>S</b> | 0.08      | 0.45      | 0.47      | 0        |
| <b>position 133</b> | <b>N</b> | 0.17      | 0.17      | 0.5       | 0.16     |
|                     | <b>N</b> | 0.19      | 0.08      | 0.35      | 0.38     |
|                     | <b>S</b> | 0         | 0.7       | 0.3       | 0        |
